# Supplementary material for: First Responders’ Knowledge of and Training Needs in Autism: An Integration Key Perspectives and Evidence-Based Practice
Source: Research Square preprint supplement (doi:10.21203/rs.3.rs-8129611/v1), 2025-12-10
Supplement: Supplementary file 1 [file f86badbd7b709f86b39d983c.docx]

**Supplemental Materials**

**Parent/Caregiver Focus Group and Interview Script**

1. What scenarios involving your child have led to a first responder interaction or 911 call in the past? *For individual anecdotes given, get a sense of what branch of first response arrived on the scene)*

2. Thinking of these scenarios, what has gone well? Did the dispatched party tell you what first responder(s) would be doing upon arrival? What questions did first responders you interacted with ask you?

3. Thinking of these scenarios, what has not gone well?

4. Do you feel like the First Responder(s) you met with had a good understanding of autism?

Did the First Responder leave you feeling like you were better equipped to handle the situation next time?

5. What would you like first responders to know is helpful for supporting your child with autism?

6. What would you like first responders to know is not helpful in supporting your child with autism?

7. Do you feel comfortable disclosing your child’s autism to a first responder or to 911 dispatch and if so, what is your preferred method for disclosing your child’s autism (e.g., verbally, a visual signal such as a pin or sticker, handing a note)?

8. When your child is in crisis due to a medical issue, behavioral concern, or other concern, what are things other people can do to help your child calm down?

9. Are there any other things you would like a first responder to know about your child when arriving at a scene?

10. Do you feel comfortable calling 911 again in the future? If not, why not?

**Autistic Adults Interview Questions**

1. Have you ever had an interaction with a first responder during an emergency situation, like when you needed help or were in trouble?
   1. Have you ever interacted with an:
      1. emergency medical technician (EMT) or paramedic?
      2. Firefighter?
      3. Police officer?
         1. Thinking about your experience with [first group endorsed], did that person do anything to make you feel more comfortable or safe?
         2. Did this [first responder type] do anything to make you feel less comfortable or safe?

*(Repeat as necessary for each group)*

1. What are situations in which you may have needed help from a first responder in the past?
2. If you are in an emergency, what would you like the first responder to know about how you communicate?
3. If you are in a situation in the future where 911 might be called, what would you like the first responder to know about how you experiences senses, like:
   1. Sound?
   2. Sight?
   3. Touch?
   4. Smell?
   5. Taste?
4. Is there anything that would be helpful for YOU to have known before your interaction with a first responder?
5. When you are upset or in pain, what are things other people can do to help you calm down?
6. When you are upset or in pain, what are some things other people do that do NOT help you calm down or stay calm?
7. Are there any other things that would be helpful for first responders to know about you that can help you in an emergency situation?
8. Do you have any suggested autism-friendly strategies first responders can use to better help you?

**First Responder Focus Group Questions**

1. Have you previously interacted with someone with autism while performing your role as a first responder?

2. Thinking of these scenarios, what has gone well?

3. Thinking of these scenarios, what has not gone well?

4. If you were to receive education on special health populations such as autism, what would be your preferred learning format (e.g., in person, virtual, hybrid)?

5. If you were to receive education on autism, what type of training materials would you prefer (e.g., cheat sheets, powerpoint slides, manuals, visuals)?

6. If you were to receive education on autism, what do you think would be the most impactful or effective way to help you understand and retain information?

7. If you were to receive education on interacting with people with autism, what do you think would be the most effective way to help you feel confident or effective?

8. Thinking of how you and your profession work with other first responder groups on a scene, what would be a good way to ensure everyone is on the same page when interacting with an individual with autism?

9. Thinking about how you and your profession work with other first responder groups on a scene, what are some barriers you might anticipate experiencing to making sure everyone is on the same page when interacting with an individual with autism?

10. What are helpful things someone with autism or their caregiver(s) can do to help you react effectively to a person while on scene?
